# Supplementary material
Source: publisher figshare collection journal article supplement (https://acs.figshare.com/ndownloader/files/3928651)
Supplement: Supplementary file 1 [file 3928651]

 
data_hfj_889 
 
_audit_creation_method            SHELXL-97 
_chemical_name_systematic 
; 
 ? 
; 
_chemical_name_common             ? 
_chemical_melting_point           '242-243'
_chemical_formula_moiety          'C36 H38 O8' 
_chemical_formula_sum 		  'C36 H38 O8' 
_chemical_formula_weight          598.66 
 
loop_ 
 _atom_type_symbol 
 _atom_type_description 
 _atom_type_scat_dispersion_real 
 _atom_type_scat_dispersion_imag 
 _atom_type_scat_source 
 'C'  'C'   0.0033   0.0000 
 'International Tables Vol C Tables 4.2.6.8 and 6.1.1.4' 
 'H'  'H'   0.0000   0.0000 
 'International Tables Vol C Tables 4.2.6.8 and 6.1.1.4' 
 'O'  'O'   0.0106   0.0000 
 'International Tables Vol C Tables 4.2.6.8 and 6.1.1.4' 
 
_symmetry_cell_setting            Orthorhombic 
_symmetry_space_group_name_H-M    'p c c n' 
_symmetry_space_group_name_Hall   '-P 2ab 2ac'
 
loop_ 
 _symmetry_equiv_pos_as_xyz 
 'x, y, z' 
 '-x+1/2, -y+1/2, z' 
 '-x, y+1/2, -z+1/2' 
 'x+1/2, -y, -z+1/2' 
 '-x, -y, -z' 
 'x-1/2, y-1/2, -z' 
 'x, -y-1/2, z-1/2' 
 '-x-1/2, y, z-1/2' 
 
_cell_length_a                    14.3696(6) 
_cell_length_b                    24.3570(10) 
_cell_length_c                    8.8820(4) 
_cell_angle_alpha                 90.00 
_cell_angle_beta                  90.00 
_cell_angle_gamma                 90.00 
_cell_volume                      3108.7(2) 
_cell_formula_units_Z             4 
_cell_measurement_temperature     100(2) 
_cell_measurement_reflns_used     2614
_cell_measurement_theta_min       2.82
_cell_measurement_theta_max       25.30
 
_exptl_crystal_description        needle 
_exptl_crystal_colour             colorless 
_exptl_crystal_size_max           0.47 
_exptl_crystal_size_mid           0.07 
_exptl_crystal_size_min           0.07 
_exptl_crystal_density_meas       ? 
_exptl_crystal_density_diffrn     1.279 
_exptl_crystal_density_method     'not measured' 
_exptl_crystal_F_000              1272 
_exptl_absorpt_coefficient_mu     0.090 
_exptl_absorpt_correction_type    'multi-scan'  
_exptl_absorpt_correction_T_min   0.9592 
_exptl_absorpt_correction_T_max   0.9937 
_exptl_absorpt_process_details    'SADABS (Bruker, 2006)'  
 
_exptl_special_details 
; 
 ? 
; 
 
_diffrn_ambient_temperature       100(2) 
_diffrn_radiation_wavelength      0.71073 
_diffrn_radiation_type            MoK\a 
_diffrn_radiation_source          'fine-focus sealed tube' 
_diffrn_radiation_monochromator   graphite 
_diffrn_measurement_device_type   'CCD area detector' 
_diffrn_measurement_method        '\w scans'
_diffrn_detector_area_resol_mean  ? 
_diffrn_reflns_number             27073 
_diffrn_reflns_av_R_equivalents   0.0984 
_diffrn_reflns_av_sigmaI/netI     0.0577 
_diffrn_reflns_limit_h_min        -18 
_diffrn_reflns_limit_h_max        18 
_diffrn_reflns_limit_k_min        -31 
_diffrn_reflns_limit_k_max        31 
_diffrn_reflns_limit_l_min        -11 
_diffrn_reflns_limit_l_max        11 
_diffrn_reflns_theta_min          1.65 
_diffrn_reflns_theta_max          27.50 
_reflns_number_total              3576 
_reflns_number_gt                 2436 
_reflns_threshold_expression      I>2\s(I) 
 
_computing_data_collection       'APEX2 (Bruker, 2007)'
_computing_cell_refinement       'SAINT (Bruker, 2007)'
_computing_data_reduction        'SAINT (Bruker, 2007)'
_computing_structure_solution    'SHELXS97 (Sheldrick, 2008)'
_computing_structure_refinement
;  
SHELXL97 (Sheldrick, 2008), Olex2 (Dolomanov & Puschmann, 2009)
;
_computing_molecular_graphics    'X-SEED (Barbour, 2001)'
_computing_publication_material
;  
SHELXL-97 (Sheldrick, 2008), enCIFer (Allen et al., 2004),
; 
_refine_special_details 
; 
 Refinement of F^2^ against ALL reflections.  The weighted R-factor wR and 
 goodness of fit S are based on F^2^, conventional R-factors R are based 
 on F, with F set to zero for negative F^2^. The threshold expression of 
 F^2^ > 2sigma(F^2^) is used only for calculating R-factors(gt) etc. and is 
 not relevant to the choice of reflections for refinement.  R-factors based 
 on F^2^ are statistically about twice as large as those based on F, and R- 
 factors based on ALL data will be even larger. 
; 
 
_refine_ls_structure_factor_coef  Fsqd  
_refine_ls_matrix_type            full 
_refine_ls_weighting_scheme       calc  
_refine_ls_weighting_details 
 'calc w=1/[\s^2^(Fo^2^)+(0.0718P)^2^+2.5184P] where P=(Fo^2^+2Fc^2^)/3' 
_atom_sites_solution_primary      direct 
_atom_sites_solution_secondary    difmap 
_atom_sites_solution_hydrogens    geom 
_refine_ls_hydrogen_treatment     constr  
_refine_ls_extinction_method      none 
_refine_ls_extinction_coef        ? 
_refine_ls_number_reflns          3576 
_refine_ls_number_parameters      203 
_refine_ls_number_restraints      0 
_refine_ls_R_factor_all           0.1006 
_refine_ls_R_factor_gt            0.0641 
_refine_ls_wR_factor_ref          0.1615 
_refine_ls_wR_factor_gt           0.1439 
_refine_ls_goodness_of_fit_ref    1.051 
_refine_ls_restrained_S_all       1.051 
_refine_ls_shift/su_max           <0.001 
_refine_ls_shift/su_mean          <0.001  
 
loop_ 
 _atom_site_label 
 _atom_site_type_symbol 
 _atom_site_fract_x 
 _atom_site_fract_y 
 _atom_site_fract_z 
 _atom_site_U_iso_or_equiv 
 _atom_site_adp_type 
 _atom_site_occupancy 
 _atom_site_symmetry_multiplicity 
 _atom_site_calc_flag 
 _atom_site_refinement_flags 
 _atom_site_disorder_assembly 
 _atom_site_disorder_group 
C9B C 0.22537(15) 0.32252(9) 0.4678(3) 0.0160(5) Uani 1 1 d . . . 
C10B C 0.24555(16) 0.37819(9) 0.4514(3) 0.0181(5) Uani 1 1 d . . . 
H10B H 0.3009 0.3893 0.4066 0.022 Uiso 1 1 calc R . . 
C11B C 0.18217(16) 0.41674(9) 0.5026(3) 0.0171(5) Uani 1 1 d . . . 
C12B C 0.09784(15) 0.39919(9) 0.5702(3) 0.0173(5) Uani 1 1 d . . . 
C13B C 0.07881(16) 0.34368(9) 0.5863(3) 0.0170(5) Uani 1 1 d . . . 
H13B H 0.0239 0.3322 0.6319 0.020 Uiso 1 1 calc R . . 
C14B C 0.14309(15) 0.30525(9) 0.5330(2) 0.0148(5) Uani 1 1 d . . . 
C8B C 0.28469(15) 0.27447(9) 0.4238(2) 0.0146(5) Uani 1 1 d . . . 
H8B H 0.3117 0.2799 0.3236 0.018 Uiso 1 1 calc R . . 
C7B C 0.36100(15) 0.25722(9) 0.5398(3) 0.0151(5) Uani 1 1 d . . . 
H7B H 0.3392 0.2683 0.6398 0.018 Uiso 1 1 calc R . . 
C1B C 0.45395(15) 0.28437(9) 0.5141(3) 0.0155(5) Uani 1 1 d . . . 
C2B C 0.47236(16) 0.33422(9) 0.5877(3) 0.0164(5) Uani 1 1 d . . . 
H2B H 0.4288 0.3483 0.6547 0.020 Uiso 1 1 calc R . . 
C3B C 0.55425(16) 0.36278(9) 0.5622(3) 0.0165(5) Uani 1 1 d . . . 
C4B C 0.62098(16) 0.34093(10) 0.4629(3) 0.0194(5) Uani 1 1 d . . . 
C5B C 0.60361(16) 0.29178(10) 0.3910(3) 0.0208(5) Uani 1 1 d . . . 
H5B H 0.6477 0.2773 0.3255 0.025 Uiso 1 1 calc R . . 
C6B C 0.52023(16) 0.26365(9) 0.4157(3) 0.0187(5) Uani 1 1 d . . . 
H6B H 0.5091 0.2307 0.3659 0.022 Uiso 1 1 calc R . . 
C17B C 0.27559(18) 0.49193(11) 0.4221(4) 0.0305(6) Uani 1 1 d . . . 
H17A H 0.3286 0.4785 0.4767 0.046 Uiso 1 1 calc R . . 
H17B H 0.2758 0.5313 0.4229 0.046 Uiso 1 1 calc R . . 
H17C H 0.2783 0.4790 0.3201 0.046 Uiso 1 1 calc R . . 
C18B C -0.05013(17) 0.42612(11) 0.6665(3) 0.0283(6) Uani 1 1 d . . . 
H18A H -0.0800 0.4022 0.5955 0.042 Uiso 1 1 calc R . . 
H18B H -0.0871 0.4586 0.6798 0.042 Uiso 1 1 calc R . . 
H18C H -0.0438 0.4076 0.7613 0.042 Uiso 1 1 calc R . . 
C15B C 0.51330(18) 0.43360(11) 0.7342(3) 0.0285(6) Uani 1 1 d . . . 
H15A H 0.4552 0.4420 0.6862 0.043 Uiso 1 1 calc R . . 
H15B H 0.5389 0.4664 0.7774 0.043 Uiso 1 1 calc R . . 
H15C H 0.5032 0.4069 0.8120 0.043 Uiso 1 1 calc R . . 
C16B C 0.76712(19) 0.35404(13) 0.3398(4) 0.0370(7) Uani 1 1 d . . . 
H16A H 0.7922 0.3195 0.3726 0.055 Uiso 1 1 calc R . . 
H16B H 0.8163 0.3806 0.3329 0.055 Uiso 1 1 calc R . . 
H16C H 0.7386 0.3496 0.2428 0.055 Uiso 1 1 calc R . . 
O11B O 0.19241(11) 0.47240(7) 0.4916(2) 0.0237(4) Uani 1 1 d . . . 
O12B O 0.03974(11) 0.44097(7) 0.6116(2) 0.0223(4) Uani 1 1 d . . . 
O3B O 0.57660(11) 0.41201(7) 0.62550(19) 0.0212(4) Uani 1 1 d . . . 
O4B O 0.69921(11) 0.37251(7) 0.4452(2) 0.0257(4) Uani 1 1 d . . . 
 
loop_ 
 _atom_site_aniso_label 
 _atom_site_aniso_U_11 
 _atom_site_aniso_U_22 
 _atom_site_aniso_U_33 
 _atom_site_aniso_U_23 
 _atom_site_aniso_U_13 
 _atom_site_aniso_U_12 
C9B 0.0128(11) 0.0219(12) 0.0134(11) 0.0006(9) -0.0002(9) 0.0001(9) 
C10B 0.0136(11) 0.0213(11) 0.0195(12) 0.0013(9) 0.0009(9) -0.0017(10) 
C11B 0.0146(11) 0.0173(11) 0.0194(12) 0.0020(9) -0.0023(9) -0.0016(9) 
C12B 0.0130(11) 0.0201(11) 0.0189(12) -0.0020(9) -0.0016(9) 0.0024(9) 
C13B 0.0113(10) 0.0218(11) 0.0178(11) 0.0000(9) -0.0003(9) -0.0009(9) 
C14B 0.0128(10) 0.0180(11) 0.0135(11) 0.0004(9) -0.0032(9) -0.0027(9) 
C8B 0.0119(10) 0.0195(11) 0.0124(11) 0.0002(9) 0.0016(8) -0.0006(9) 
C7B 0.0111(10) 0.0192(11) 0.0150(11) -0.0009(9) 0.0012(9) 0.0001(9) 
C1B 0.0114(10) 0.0197(11) 0.0153(11) 0.0019(9) -0.0001(9) -0.0012(9) 
C2B 0.0122(11) 0.0199(11) 0.0172(11) 0.0006(9) 0.0011(9) 0.0017(9) 
C3B 0.0140(11) 0.0191(11) 0.0165(12) 0.0010(9) -0.0023(9) -0.0003(9) 
C4B 0.0105(11) 0.0255(12) 0.0222(13) 0.0044(10) 0.0006(9) -0.0033(9) 
C5B 0.0147(11) 0.0244(12) 0.0234(13) 0.0001(10) 0.0048(10) 0.0019(10) 
C6B 0.0170(11) 0.0186(12) 0.0206(12) -0.0018(9) 0.0012(10) -0.0009(9) 
C17B 0.0194(13) 0.0205(13) 0.0517(18) 0.0061(12) 0.0075(12) -0.0049(10) 
C18B 0.0161(12) 0.0245(13) 0.0442(17) -0.0005(12) 0.0093(12) 0.0011(10) 
C15B 0.0184(13) 0.0278(14) 0.0394(16) -0.0123(12) 0.0045(12) -0.0046(11) 
C16B 0.0182(14) 0.0478(18) 0.0449(18) -0.0055(14) 0.0151(13) -0.0070(13) 
O11B 0.0163(8) 0.0173(8) 0.0375(10) 0.0023(7) 0.0046(8) -0.0015(7) 
O12B 0.0144(8) 0.0182(8) 0.0343(10) -0.0013(7) 0.0052(7) 0.0005(7) 
O3B 0.0145(8) 0.0199(8) 0.0292(9) -0.0038(7) 0.0022(7) -0.0049(7) 
O4B 0.0117(8) 0.0327(10) 0.0327(10) 0.0002(8) 0.0063(7) -0.0071(7) 
 
_geom_special_details 
; 
 All esds (except the esd in the dihedral angle between two l.s. planes) 
 are estimated using the full covariance matrix.  The cell esds are taken 
 into account individually in the estimation of esds in distances, angles 
 and torsion angles; correlations between esds in cell parameters are only 
 used when they are defined by crystal symmetry.  An approximate (isotropic) 
 treatment of cell esds is used for estimating esds involving l.s. planes. 
; 
 
loop_ 
 _geom_bond_atom_site_label_1 
 _geom_bond_atom_site_label_2 
 _geom_bond_distance 
 _geom_bond_site_symmetry_2 
 _geom_bond_publ_flag 
C9B C14B 1.382(3) . ? 
C9B C10B 1.394(3) . ? 
C9B C8B 1.500(3) . ? 
C10B C11B 1.385(3) . ? 
C10B H10B 0.9300 . ? 
C11B O11B 1.367(3) . ? 
C11B C12B 1.418(3) . ? 
C12B O12B 1.366(3) . ? 
C12B C13B 1.387(3) . ? 
C13B C14B 1.397(3) . ? 
C13B H13B 0.9300 . ? 
C14B C7B 1.524(3) 2 ? 
C8B C8B 1.554(4) 2 ? 
C8B C7B 1.562(3) . ? 
C8B H8B 0.9800 . ? 
C7B C1B 1.508(3) . ? 
C7B C14B 1.524(3) 2 ? 
C7B H7B 0.9800 . ? 
C1B C6B 1.387(3) . ? 
C1B C2B 1.404(3) . ? 
C2B C3B 1.386(3) . ? 
C2B H2B 0.9300 . ? 
C3B O3B 1.363(3) . ? 
C3B C4B 1.407(3) . ? 
C4B O4B 1.371(3) . ? 
C4B C5B 1.380(3) . ? 
C5B C6B 1.398(3) . ? 
C5B H5B 0.9300 . ? 
C6B H6B 0.9300 . ? 
C17B O11B 1.427(3) . ? 
C17B H17A 0.9600 . ? 
C17B H17B 0.9600 . ? 
C17B H17C 0.9600 . ? 
C18B O12B 1.427(3) . ? 
C18B H18A 0.9600 . ? 
C18B H18B 0.9600 . ? 
C18B H18C 0.9600 . ? 
C15B O3B 1.427(3) . ? 
C15B H15A 0.9600 . ? 
C15B H15B 0.9600 . ? 
C15B H15C 0.9600 . ? 
C16B O4B 1.425(3) . ? 
C16B H16A 0.9600 . ? 
C16B H16B 0.9600 . ? 
C16B H16C 0.9600 . ? 
 
loop_ 
 _geom_angle_atom_site_label_1 
 _geom_angle_atom_site_label_2 
 _geom_angle_atom_site_label_3 
 _geom_angle 
 _geom_angle_site_symmetry_1 
 _geom_angle_site_symmetry_3 
 _geom_angle_publ_flag 
C14B C9B C10B 121.2(2) . . ? 
C14B C9B C8B 111.0(2) . . ? 
C10B C9B C8B 127.8(2) . . ? 
C11B C10B C9B 119.2(2) . . ? 
C11B C10B H10B 120.4 . . ? 
C9B C10B H10B 120.4 . . ? 
O11B C11B C10B 125.3(2) . . ? 
O11B C11B C12B 114.9(2) . . ? 
C10B C11B C12B 119.8(2) . . ? 
O12B C12B C13B 125.3(2) . . ? 
O12B C12B C11B 114.3(2) . . ? 
C13B C12B C11B 120.4(2) . . ? 
C12B C13B C14B 119.2(2) . . ? 
C12B C13B H13B 120.4 . . ? 
C14B C13B H13B 120.4 . . ? 
C9B C14B C13B 120.2(2) . . ? 
C9B C14B C7B 110.69(19) . 2 ? 
C13B C14B C7B 129.1(2) . 2 ? 
C9B C8B C8B 103.5(2) . 2 ? 
C9B C8B C7B 115.91(18) . . ? 
C8B C8B C7B 104.12(18) 2 . ? 
C9B C8B H8B 110.9 . . ? 
C8B C8B H8B 110.9 2 . ? 
C7B C8B H8B 110.9 . . ? 
C1B C7B C14B 117.79(18) . 2 ? 
C1B C7B C8B 113.82(18) . . ? 
C14B C7B C8B 102.46(17) 2 . ? 
C1B C7B H7B 107.4 . . ? 
C14B C7B H7B 107.4 2 . ? 
C8B C7B H7B 107.4 . . ? 
C6B C1B C2B 118.6(2) . . ? 
C6B C1B C7B 122.9(2) . . ? 
C2B C1B C7B 118.4(2) . . ? 
C3B C2B C1B 121.2(2) . . ? 
C3B C2B H2B 119.4 . . ? 
C1B C2B H2B 119.4 . . ? 
O3B C3B C2B 125.1(2) . . ? 
O3B C3B C4B 115.5(2) . . ? 
C2B C3B C4B 119.4(2) . . ? 
O4B C4B C5B 125.6(2) . . ? 
O4B C4B C3B 114.7(2) . . ? 
C5B C4B C3B 119.7(2) . . ? 
C4B C5B C6B 120.5(2) . . ? 
C4B C5B H5B 119.8 . . ? 
C6B C5B H5B 119.8 . . ? 
C1B C6B C5B 120.6(2) . . ? 
C1B C6B H6B 119.7 . . ? 
C5B C6B H6B 119.7 . . ? 
O11B C17B H17A 109.5 . . ? 
O11B C17B H17B 109.5 . . ? 
H17A C17B H17B 109.5 . . ? 
O11B C17B H17C 109.5 . . ? 
H17A C17B H17C 109.5 . . ? 
H17B C17B H17C 109.5 . . ? 
O12B C18B H18A 109.5 . . ? 
O12B C18B H18B 109.5 . . ? 
H18A C18B H18B 109.5 . . ? 
O12B C18B H18C 109.5 . . ? 
H18A C18B H18C 109.5 . . ? 
H18B C18B H18C 109.5 . . ? 
O3B C15B H15A 109.5 . . ? 
O3B C15B H15B 109.5 . . ? 
H15A C15B H15B 109.5 . . ? 
O3B C15B H15C 109.5 . . ? 
H15A C15B H15C 109.5 . . ? 
H15B C15B H15C 109.5 . . ? 
O4B C16B H16A 109.5 . . ? 
O4B C16B H16B 109.5 . . ? 
H16A C16B H16B 109.5 . . ? 
O4B C16B H16C 109.5 . . ? 
H16A C16B H16C 109.5 . . ? 
H16B C16B H16C 109.5 . . ? 
C11B O11B C17B 116.85(19) . . ? 
C12B O12B C18B 117.14(18) . . ? 
C3B O3B C15B 116.93(18) . . ? 
C4B O4B C16B 117.4(2) . . ? 
 
loop_ 
 _geom_torsion_atom_site_label_1 
 _geom_torsion_atom_site_label_2 
 _geom_torsion_atom_site_label_3 
 _geom_torsion_atom_site_label_4 
 _geom_torsion 
 _geom_torsion_site_symmetry_1 
 _geom_torsion_site_symmetry_2 
 _geom_torsion_site_symmetry_3 
 _geom_torsion_site_symmetry_4 
 _geom_torsion_publ_flag 
C14B C9B C10B C11B 0.5(3) . . . . ? 
C8B C9B C10B C11B -178.5(2) . . . . ? 
C9B C10B C11B O11B -179.0(2) . . . . ? 
C9B C10B C11B C12B -0.2(3) . . . . ? 
O11B C11B C12B O12B 0.9(3) . . . . ? 
C10B C11B C12B O12B -178.0(2) . . . . ? 
O11B C11B C12B C13B 179.3(2) . . . . ? 
C10B C11B C12B C13B 0.4(3) . . . . ? 
O12B C12B C13B C14B 177.3(2) . . . . ? 
C11B C12B C13B C14B -0.9(3) . . . . ? 
C10B C9B C14B C13B -1.0(3) . . . . ? 
C8B C9B C14B C13B 178.2(2) . . . . ? 
C10B C9B C14B C7B -179.0(2) . . . 2 ? 
C8B C9B C14B C7B 0.1(3) . . . 2 ? 
C12B C13B C14B C9B 1.2(3) . . . . ? 
C12B C13B C14B C7B 178.8(2) . . . 2 ? 
C14B C9B C8B C8B 17.5(2) . . . 2 ? 
C10B C9B C8B C8B -163.4(2) . . . 2 ? 
C14B C9B C8B C7B -95.9(2) . . . . ? 
C10B C9B C8B C7B 83.3(3) . . . . ? 
C9B C8B C7B C1B -91.7(2) . . . . ? 
C8B C8B C7B C1B 155.34(18) 2 . . . ? 
C9B C8B C7B C14B 140.04(19) . . . 2 ? 
C8B C8B C7B C14B 27.1(2) 2 . . 2 ? 
C14B C7B C1B C6B 34.0(3) 2 . . . ? 
C8B C7B C1B C6B -85.9(3) . . . . ? 
C14B C7B C1B C2B -149.0(2) 2 . . . ? 
C8B C7B C1B C2B 91.0(2) . . . . ? 
C6B C1B C2B C3B 0.7(3) . . . . ? 
C7B C1B C2B C3B -176.3(2) . . . . ? 
C1B C2B C3B O3B 178.1(2) . . . . ? 
C1B C2B C3B C4B -1.2(3) . . . . ? 
O3B C3B C4B O4B 0.3(3) . . . . ? 
C2B C3B C4B O4B 179.7(2) . . . . ? 
O3B C3B C4B C5B -178.6(2) . . . . ? 
C2B C3B C4B C5B 0.7(4) . . . . ? 
O4B C4B C5B C6B -178.7(2) . . . . ? 
C3B C4B C5B C6B 0.1(4) . . . . ? 
C2B C1B C6B C5B 0.2(3) . . . . ? 
C7B C1B C6B C5B 177.1(2) . . . . ? 
C4B C5B C6B C1B -0.6(4) . . . . ? 
C10B C11B O11B C17B -0.2(3) . . . . ? 
C12B C11B O11B C17B -179.0(2) . . . . ? 
C13B C12B O12B C18B -4.3(3) . . . . ? 
C11B C12B O12B C18B 173.9(2) . . . . ? 
C2B C3B O3B C15B 4.6(3) . . . . ? 
C4B C3B O3B C15B -176.0(2) . . . . ? 
C5B C4B O4B C16B 2.2(4) . . . . ? 
C3B C4B O4B C16B -176.7(2) . . . . ? 
 
_diffrn_measured_fraction_theta_max    1.000 
_diffrn_reflns_theta_full              25.00 
_diffrn_measured_fraction_theta_full   1.000 
_refine_diff_density_max    0.372 
_refine_diff_density_min   -0.274 
_refine_diff_density_rms    0.066 
